# Supplementary material for: Real-World Safety and Effectiveness of Remdesivir and Corticosteroids in Hospitalized Patients with COVID-19
Source: MDPI journal article supplement (doi:10.3390/covid3020015), 2023-02-05
Supplement: s1 [file s1]

## Supplemental Material

Table S1. Variables included in the propensity score model

|                                                                                                                                                                                           |
|-------------------------------------------------------------------------------------------------------------------------------------------------------------------------------------------|
| Abdominal pain 30 days prior to index date                                                                                                                                                |
| Age at index date                                                                                                                                                                         |
| Angiotensin receptor blockers inhibitors use 90 days prior to index date                                                                                                                  |
| Angiotensin receptor blockers inhibitors use during admission concomitant with remdesivir in the remdesivir group or concomitant with corticosteroids in the corticosteroid group         |
| Angiotensin-converting-enzyme's inhibitors use 90 days prior to index date                                                                                                                |
| Angiotensin-converting-enzyme's inhibitors use during admission concomitant with remdesivir in the remdesivir group or concomitant with corticosteroids in the corticosteroid group       |
| Angiotensin-converting-enzyme's inhibitors use during admission prior to remdesivir initiation in the remdesivir group or prior to corticosteroids initiation in the corticosteroid group |
| Antibiotics use 90 days prior to index date                                                                                                                                               |
| Antibiotics use during admission concomitant with remdesivir in the remdesivir group or concomitant with corticosteroids in the corticosteroid group                                      |
| Antibiotics use during admission prior to remdesivir initiation in the remdesivir group or prior to corticosteroids initiation in the corticosteroid group                                |
| Anticoagulant/antiplatelets use during admission concomitant with remdesivir in the remdesivir group or concomitant with corticosteroids in the corticosteroid group                      |
| Anticoagulant/antiplatelets use during admission prior to remdesivir initiation in the remdesivir group or prior to corticosteroids initiation in the corticosteroid group                |
| Antiparasitic use during admission concomitant with remdesivir in the remdesivir group or concomitant with corticosteroids in the corticosteroid group                                    |
| Antivirals use during admission concomitant with remdesivir in the remdesivir group or concomitant with corticosteroids in the corticosteroid group                                       |
| Baseline supplemental oxygen                                                                                                                                                              |
| Body mass index                                                                                                                                                                           |
| Charlson comorbidity index                                                                                                                                                                |
| Chills 30 days prior to index date                                                                                                                                                        |
| Corticosteroids use 90 days prior to index date                                                                                                                                           |
| Cough (new onset) 30 days prior to index date                                                                                                                                             |
| Current intensive care admission                                                                                                                                                          |
| Diarrhea 30 days prior to index date                                                                                                                                                      |
| Elixhauser score                                                                                                                                                                          |
| Ethnicity                                                                                                                                                                                 |
| Facility indicator                                                                                                                                                                        |
| Fever (>100.4F) 30 days prior to index date                                                                                                                                               |
| Fungal infection 90 days prior to index date                                                                                                                                              |
| Gender                                                                                                                                                                                    |
| H2 blocker use during admission prior to remdesivir initiation in the remdesivir group or prior to corticosteroids initiation in the corticosteroid group                                 |
| Headache 30 days prior to index date                                                                                                                                                      |
| History of acute kidney injury 2 years prior to index date                                                                                                                                |
| History of acute liver injury 2 years prior to index date                                                                                                                                 |
| History of alcohol dependence 2 years prior to index date                                                                                                                                 |
| History of any diabetes 2 years prior to index date                                                                                                                                       |
| History of arrhythmia 2 years prior to index date                                                                                                                                         |
| History of Bell's palsy 2 years prior to index date                                                                                                                                       |
| History of bipolar disorder 2 years prior to index date                                                                                                                                   |
| History of bronchitis 2 years prior to index date                                                                                                                                         |
| History of cancer 2 years prior to index date                                                                                                                                             |
| History of cardiomyopathy 2 years prior to index date                                                                                                                                     |
| History of Cheyne stokes breathing pattern 2 years prior to index date                                                                                                                    |
| History of chronic kidney disease 2 years prior to index date                                                                                                                             |
| History of chronic kidney failure 2 years prior to index date                                                                                                                             |
| History of chronic lung disease 2 years prior to index date                                                                                                                               |
| History of chronic rheumatic heart disease 2 years prior to index date                                                                                                                    |
| History of cirrhosis 2 years prior to index date                                                                                                                                          |

|                                                                                                                                                                                                                       |
|-----------------------------------------------------------------------------------------------------------------------------------------------------------------------------------------------------------------------|
| History of congestive heart failure 2 years prior to index date                                                                                                                                                       |
| History of coronary atherosclerosis and other heart disease 2 years prior to index date                                                                                                                               |
| History of dementia 2 years prior to index date                                                                                                                                                                       |
| History of emphysema 2 years prior to index date                                                                                                                                                                      |
| History of hyperlipidemia 2 years prior to index date                                                                                                                                                                 |
| History of hypertension 2 years prior to index date                                                                                                                                                                   |
| History of major depressive disorder 2 years prior to index date                                                                                                                                                      |
| History of mild liver disease 2 years prior to index date                                                                                                                                                             |
| History of nephrosis 2 years prior to index date                                                                                                                                                                      |
| History of non-alcohol drug dependency 2 years prior to index date                                                                                                                                                    |
| History of obesity hypoventilation 2 years prior to index date                                                                                                                                                        |
| History of obstructive sleep apnea 2 years prior to index date                                                                                                                                                        |
| History of other heart disease/ill-defined heart disease 2 years prior to index date                                                                                                                                  |
| History of pneumonia 2 years prior to index date                                                                                                                                                                      |
| History of pulmonary fibrosis 2 years prior to index date                                                                                                                                                             |
| History of schizophrenia 2 years prior to index date                                                                                                                                                                  |
| History of septic shock 2 years prior to index date                                                                                                                                                                   |
| History of sickle cell disease 2 years prior to index date                                                                                                                                                            |
| History of sleep apnea 2 years prior to index date                                                                                                                                                                    |
| History of sleep related non-obstructive hypoventilation 2 years prior to index date                                                                                                                                  |
| History of thalassemia 2 years prior to index date                                                                                                                                                                    |
| History of urinary stones/kidney stones 2 years prior to index date                                                                                                                                                   |
| History of ventilator-associated pneumonia 2 years prior to index date                                                                                                                                                |
| Immunosuppressants use 90 days prior to index date                                                                                                                                                                    |
| Immunosuppressants use during admission prior to remdesivir initiation in the remdesivir group or prior to corticosteroids initiation in the corticosteroid group                                                     |
| Interleukin-6 inhibitors use 90 days prior to index date                                                                                                                                                              |
| Interleukin-6 inhibitors use during admission concomitant with remdesivir in the remdesivir group or concomitant with corticosteroids in the corticosteroid group                                                     |
| Interleukin-6 inhibitors use during admission prior to remdesivir initiation in the remdesivir group or prior to corticosteroids initiation in the corticosteroid group                                               |
| Janus kinase inhibitors use 90 days prior to index date                                                                                                                                                               |
| Janus kinase inhibitors use during admission concomitant with remdesivir in the remdesivir group or concomitant with corticosteroids in the corticosteroid group                                                      |
| Janus kinase inhibitors use during admission prior to remdesivir initiation in the remdesivir group or prior to corticosteroids initiation in the corticosteroid group                                                |
| Loss of smell 30 days prior to index date                                                                                                                                                                             |
| Malaise (fatigue) 30 days prior to index date                                                                                                                                                                         |
| Marital status                                                                                                                                                                                                        |
| Monoclonal antibodies (bamlanivimab/etesevimab, casirivimab/imdevimab) use during admission concomitant with remdesivir in the remdesivir group or concomitant with corticosteroids in the corticosteroid group       |
| Monoclonal antibodies (bamlanivimab/etesevimab, casirivimab/imdevimab) use during admission prior to remdesivir initiation in the remdesivir group or prior to corticosteroids initiation in the corticosteroid group |
| Month and year of index date                                                                                                                                                                                          |
| Muscle aches (myalgia) 30 days prior to index date                                                                                                                                                                    |
| Non-steroidal anti-inflammatory drugs use during admission concomitant with remdesivir in the remdesivir group or concomitant with corticosteroids in the corticosteroid group                                        |
| Non-steroidal anti-inflammatory drugs use during admission prior to remdesivir initiation in the remdesivir group or prior to corticosteroids initiation in the corticosteroid group                                  |
| Race                                                                                                                                                                                                                  |
| Rurality                                                                                                                                                                                                              |
| Smoking status                                                                                                                                                                                                        |
| Source of admission                                                                                                                                                                                                   |
| Statin use during admission concomitant with remdesivir in the remdesivir group or concomitant with corticosteroids in the corticosteroid group                                                                       |
| Statin use during admission prior to remdesivir initiation in the remdesivir group or prior to corticosteroids initiation in the corticosteroid group                                                                 |
| Treating specialty                                                                                                                                                                                                    |
| Vaccination status                                                                                                                                                                                                    |

Table S2. Sensitivity analyses of time-to-event outcomes among hospitalized patients with COVID-19 and treated with remdesivir-based regimens and non-remdesivir-based regimens

|                        | No. of events / No. of patients (%) |                     | Adjusted hazards ratio and 95% confidence interval, model 1 <sup>a</sup> | Adjusted hazards ratio and 95% confidence interval, model 2 <sup>b</sup> | Variable controlled for in model 2                                                                                                           |
|------------------------|-------------------------------------|---------------------|--------------------------------------------------------------------------|--------------------------------------------------------------------------|----------------------------------------------------------------------------------------------------------------------------------------------|
| Time-to-event outcomes | Remdesivir                          | Non-remdesivir      |                                                                          |                                                                          |                                                                                                                                              |
| Inpatient mortality    |                                     |                     |                                                                          |                                                                          |                                                                                                                                              |
| PS quintile adjusted   | 1,838/14,509 (12.7%)                | 620/4,365 (14.2%)   | <b>0.87 (0.78-0.97)</b>                                                  | <b>0.86 (0.77-0.95)</b>                                                  | Cefepime, enoxaparin, heparin, hydrocortisone, prednisone, vancomycin                                                                        |
| PS matched             | 440/3,325 (13.2%)                   | 465/3,325 (14%)     | <b>0.70 (0.53-0.93)</b>                                                  | <b>0.66 (0.51-0.86)</b>                                                  | Heparin, prednisone                                                                                                                          |
| IPTW                   | 1,838/14,509 (12.7%)                | 620/4,365 (14.2%)   | <b>0.85 (0.78-0.92)</b>                                                  | <b>0.85 (0.78-0.92)</b>                                                  | Cefepime, enoxaparin, heparin, hydrocortisone, methylprednisolone, prednisone, vancomycin                                                    |
| 30-day mortality       |                                     |                     |                                                                          |                                                                          |                                                                                                                                              |
| PS quintile adjusted   | 485/12,671 (3.8%)                   | 240/3,745 (6.4%)    | <b>0.82 (0.69-0.98)</b>                                                  | <b>0.81 (0.69-0.96)</b>                                                  | Cefepime, dexamethasone, enoxaparin, meropenem, piperacillin/tazobactam                                                                      |
| PS matched             | 125/2,885 (4.3%)                    | 166/2,860 (5.8%)    | <b>0.72 (0.54-0.96)</b>                                                  | <b>0.71 (0.55-0.93)</b>                                                  | Enoxaparin, vancomycin                                                                                                                       |
| IPTW                   | 485/12,671 (3.8%)                   | 240/3,745 (6.4%)    | <b>0.85 (0.74-0.98)</b>                                                  | <b>0.84 (0.73-0.97)</b>                                                  | Cefepime, dexamethasone, enoxaparin, piperacillin/tazobactam                                                                                 |
| 60-day mortality       |                                     |                     |                                                                          |                                                                          |                                                                                                                                              |
| PS quintile adjusted   | 635/12,671 (5.0%)                   | 316/3,745 (8.4%)    | <b>0.81 (0.70-0.94)</b>                                                  | <b>0.81 (0.70-0.93)</b>                                                  | Cefepime, dexamethasone, enoxaparin, piperacillin/tazobactam, vancomycin                                                                     |
| PS matched             | 161/2,885 (5.6%)                    | 217/2,860 (7.6%)    | <b>0.70 (0.54-0.90)</b>                                                  | <b>0.72 (0.57-0.91)</b>                                                  | Enoxaparin, vancomycin                                                                                                                       |
| IPTW                   | 635/12,671 (5.0%)                   | 316/3,745 (8.4%)    | <b>0.85 (0.75-0.97)</b>                                                  | <b>0.85 (0.75-0.96)</b>                                                  | Cefepime, dexamethasone, enoxaparin, piperacillin/tazobactam, vancomycin                                                                     |
| 90-day mortality       |                                     |                     |                                                                          |                                                                          |                                                                                                                                              |
| PS quintile adjusted   | 721/12,671 (5.7%)                   | 358/3,745 (9.6%)    | <b>0.84 (0.73-0.96)</b>                                                  | <b>0.85 (0.74-0.97)</b>                                                  | Cefepime, enoxaparin, piperacillin/tazobactam, vancomycin                                                                                    |
| PS matched             | 189/2,885 (6.6%)                    | 242/2,860 (8.5%)    | <b>0.74 (0.59-0.94)</b>                                                  | <b>0.76 (0.61-0.94)</b>                                                  | Enoxaparin, piperacillin/tazobactam, vancomycin                                                                                              |
| IPTW                   | 721/12,671 (5.7%)                   | 358/3,745 (9.6%)    | <b>0.88 (0.78-0.99)</b>                                                  | 0.89 (0.79-1.00)                                                         | Enoxaparin, vancomycin                                                                                                                       |
| Hospital discharge     |                                     |                     |                                                                          |                                                                          |                                                                                                                                              |
| PS quintile adjusted   | 12,671/14,509 (87.3%)               | 3,745/4,365 (85.8%) | <b>0.75 (0.72-0.78)</b>                                                  | <b>0.75 (0.72-0.78)</b>                                                  | Cefepime, enoxaparin, heparin, dexamethasone, hydrocortisone, meropenem, methylprednisolone, piperacillin/tazobactam, vancomycin             |
| PS matched             | 2,885/3,325 (86.8%)                 | 2,860/3,325 (86.0%) | <b>0.66 (0.61-0.71)</b>                                                  | <b>0.66 (0.61-0.71)</b>                                                  | Cefepime, enoxaparin, heparin, dexamethasone, hydrocortisone, meropenem, methylprednisolone, piperacillin/tazobactam, vancomycin             |
| IPTW                   | 12,671/14,509 (87.3%)               | 3,745/4,365 (85.8%) | <b>0.75 (0.73-0.77)</b>                                                  | <b>0.75 (0.73-0.77)</b>                                                  | Cefepime, enoxaparin, heparin, dexamethasone, hydrocortisone, meropenem, methylprednisolone, piperacillin/tazobactam, prednisone, vancomycin |
| ICU discharge          |                                     |                     |                                                                          |                                                                          |                                                                                                                                              |
| PS quintile adjusted   | 4,187/5,699 (73.5%)                 | 1,083/1,567 (69.1%) | <b>0.75 (0.70-0.81)</b>                                                  | <b>0.74 (0.69-0.80)</b>                                                  | Cefepime, enoxaparin, heparin, dexamethasone, hydrocortisone, meropenem,                                                                     |

|                      |                      |                     |                         |                         |                                                                                                                                  |
|----------------------|----------------------|---------------------|-------------------------|-------------------------|----------------------------------------------------------------------------------------------------------------------------------|
|                      |                      |                     |                         |                         | methylprednisolone, piperacillin/tazobactam, vancomycin                                                                          |
| PS matched           | 839/1,195 (70.2%)    | 859/1,231 (69.8%)   | <b>0.64 (0.50-0.82)</b> | <b>0.67 (0.53-0.84)</b> | Cefepime, vancomycin                                                                                                             |
| IPTW                 | 4,187/5,699 (73.5%)  | 1,083/1,567 (69.1%) | <b>0.75 (0.71-0.80)</b> | <b>0.75 (0.71-0.80)</b> | Cefepime, enoxaparin, heparin, dexamethasone, hydrocortisone, meropenem, methylprednisolone, piperacillin/tazobactam, vancomycin |
| Bacterial infection  |                      |                     |                         |                         |                                                                                                                                  |
| PS quintile adjusted | 1,618/14,229 (11.4%) | 390/4,257 (9.2%)    | <b>1.38 (1.22-1.57)</b> | <b>1.37 (1.22-1.55)</b> | Cefepime, heparin, meropenem, methylprednisolone, piperacillin/tazobactam, vancomycin                                            |
| PS matched           | 390/3,249 (12.0%)    | 281/3,243 (8.7%)    | <b>1.78 (1.37-2.31)</b> | <b>1.72 (1.35-2.19)</b> | Heparin, methylprednisolone, vancomycin                                                                                          |
| IPTW                 | 1,618/14,229 (11.4%) | 390/4,257 (9.2%)    | <b>1.29 (1.17-1.42)</b> | <b>1.29 (1.17-1.42)</b> | Cefepime, heparin, dexamethasone, hydrocortisone, methylprednisolone, piperacillin/tazobactam, vancomycin                        |
| Fungal infection     |                      |                     |                         |                         |                                                                                                                                  |
| PS quintile adjusted | 628/14,497 (4.3%)    | 170/4,359 (3.9%)    | <b>1.42 (1.16-1.73)</b> | <b>1.39 (1.15-1.69)</b> | Cefepime, heparin, dexamethasone, meropenem, piperacillin/tazobactam, vancomycin                                                 |
| PS matched           | 136/3,322 (4.1%)     | 122/3,321 (3.7%)    | 1.16 (0.68-1.96)        | 0.96 (0.62-1.47)        | Vancomycin                                                                                                                       |
| IPTW                 | 628/14,497 (4.3%)    | 170/4,359 (3.9%)    | <b>1.38 (1.18-1.62)</b> | <b>1.37 (1.17-1.60)</b> | Heparin, dexamethasone, hydrocortisone, meropenem, piperacillin/tazobactam, vancomycin                                           |
| Acute kidney injury  |                      |                     |                         |                         |                                                                                                                                  |
| PS quintile adjusted | 479/7,886 (6.1%)     | 73/1,784 (4.1%)     | <b>1.31 (1.01-1.72)</b> | <b>1.34 (1.03-1.74)</b> | Cefepime, heparin, hydrocortisone, vancomycin                                                                                    |
| PS matched           | 92/1,649 (5.6%)      | 66/1,540 (4.3%)     | 1.00 (0.06-16.0)        | 1.00 (0.38-2.66)        | No significant variables                                                                                                         |
| IPTW                 | 479/7,886 (6.1%)     | 73/1,784 (4.1%)     | 1.06 (0.88-1.28)        | 1.10 (0.92-1.32)        | Enoxaparin, heparin, hydrocortisone, vancomycin                                                                                  |
| 30-day readmission   |                      |                     |                         |                         |                                                                                                                                  |
| PS quintile adjusted | 1,363/12,671 (10.8%) | 578/3,745 (15.4%)   | <b>0.86 (0.77-0.95)</b> | <b>0.86 (0.77-0.95)</b> | Enoxaparin, dexamethasone, prednisone, vancomycin                                                                                |
| PS matched           | 341/2,885 (11.8%)    | 397/2,860 (13.9%)   | 0.95 (0.79-1.14)        | 0.91 (0.77-1.07)        | Enoxaparin, heparin                                                                                                              |
| IPTW                 | 1,363/12,671 (10.8%) | 578/3,745 (15.4%)   | 0.92 (0.84-1.00)        | 0.91 (0.83-1.00)        | Enoxaparin, dexamethasone, meropenem, prednisone, vancomycin                                                                     |

<sup>a</sup> Model 1: Cox proportional hazards model controlled for concomitant cefepime, dexamethasone, enoxaparin, heparin, hydrocortisone, meropenem, methylprednisolone, piperacillin-tazobactam, prednisone, and vancomycin.

<sup>b</sup> Model 2: Cox proportional hazards model controlled for significant (p<0.05) variables from Model 1 using automatic backward elimination.

Table S3. Subgroup analyses of time-to-event outcomes among hospitalized patients with COVID-19 and treated with remdesivir-based regimens and non-remdesivir-based regimens, index dates from May 1, 2020 to December 31, 2020 ( $n = 7438$ )

|                        | No. of events / No. of patients (%) |                     | Hazard ratio | Lower confidence limit | Upper confidence limit |
|------------------------|-------------------------------------|---------------------|--------------|------------------------|------------------------|
| Time-to-event outcomes | Remdesivir                          | Non-remdesivir      |              |                        |                        |
| Inpatient mortality    |                                     |                     |              |                        |                        |
| PS quintile adjusted   | 702/5,531 (12.7%)                   | 265/1,907 (13.9%)   | <b>0.812</b> | <b>0.698</b>           | <b>0.944</b>           |
| PS matched             | 199/1,460 (13.6%)                   | 186/1,396 (13.3%)   | 0.781        | 0.463                  | 1.318                  |
| IPTW                   | 702/5,531 (12.7%)                   | 265/1,907 (13.9%)   | <b>0.804</b> | <b>0.708</b>           | <b>0.912</b>           |
| 30-day mortality       |                                     |                     |              |                        |                        |
| PS quintile adjusted   | 206/4,829 (4.3%)                    | 114/1,642 (6.9%)    | <b>0.755</b> | <b>0.593</b>           | <b>0.96</b>            |
| PS matched             | 60/1,261 (4.8%)                     | 78/1,210 (6.4%)     | 0.722        | 0.436                  | 1.196                  |
| IPTW                   | 206/4,829 (4.3%)                    | 114/1,642 (6.9%)    | <b>0.787</b> | <b>0.637</b>           | <b>0.974</b>           |
| 60-day mortality       |                                     |                     |              |                        |                        |
| PS quintile adjusted   | 287/4,829 (5.9%)                    | 149/1,642 (9.1%)    | <b>0.792</b> | <b>0.643</b>           | <b>0.975</b>           |
| PS matched             | 77/1,261 (6.1%)                     | 101/1,210 (8.3%)    | <b>0.62</b>  | <b>0.396</b>           | <b>0.97</b>            |
| IPTW                   | 287/4,829 (5.9%)                    | 149/1,642 (9.1%)    | 0.844        | 0.701                  | 1.016                  |
| 90-day mortality       |                                     |                     |              |                        |                        |
| PS quintile adjusted   | 319/4,829 (6.6%)                    | 167/1,642 (10.2%)   | <b>0.794</b> | <b>0.652</b>           | <b>0.966</b>           |
| PS matched             | 86/1,261 (6.8%)                     | 112/1,210 (9.3%)    | 0.712        | 0.467                  | 1.085                  |
| IPTW                   | 319/4,829 (6.6%)                    | 167/1,642 (10.2%)   | 0.851        | 0.714                  | 1.014                  |
| Hospital discharge     |                                     |                     |              |                        |                        |
| PS quintile adjusted   | 4,829/5,531 (87.3%)                 | 1,642/1,907 (86.1%) | <b>0.847</b> | <b>0.798</b>           | <b>0.899</b>           |
| PS matched             | 1,261/1,460 (86.4%)                 | 1,210/1,396 (86.7%) | <b>0.688</b> | <b>0.586</b>           | <b>0.808</b>           |
| IPTW                   | 4,829/5,531 (87.3%)                 | 1,642/1,907 (86.1%) | <b>0.822</b> | <b>0.783</b>           | <b>0.863</b>           |
| ICU discharge          |                                     |                     |              |                        |                        |
| PS quintile adjusted   | 1,692/2,267 (74.6%)                 | 480/685 (70.1%)     | 0.924        | 0.829                  | 1.029                  |
| PS matched             | 399/556 (71.8%)                     | 372/524 (71.0%)     | 0.787        | 0.512                  | 1.211                  |
| IPTW                   | 1,692/2,267 (74.6%)                 | 480/685 (70.1%)     | <b>0.888</b> | <b>0.815</b>           | <b>0.968</b>           |
| Bacterial infection    |                                     |                     |              |                        |                        |
| PS quintile adjusted   | 615/5,416 (11.4%)                   | 162/1,853 (8.7%)    | <b>1.29</b>  | <b>1.074</b>           | <b>1.55</b>            |
| PS matched             | 182/1,423 (12.8%)                   | 110/1,359 (8.1%)    | <b>2.095</b> | <b>1.246</b>           | <b>3.524</b>           |
| IPTW                   | 615/5,416 (11.4%)                   | 162/1,853 (8.7%)    | <b>1.291</b> | <b>1.11</b>            | <b>1.503</b>           |
| Fungal infection       |                                     |                     |              |                        |                        |

|                      |                   |                   |              |              |              |
|----------------------|-------------------|-------------------|--------------|--------------|--------------|
| PS quintile adjusted | 263/5,525 (4.8%)  | 70/1,905 (3.7%)   | 1.171        | 0.886        | 1.549        |
| PS matched           | 61/1,459 (4.2%)   | 44/1,394 (3.2%)   | 0.833        | 0.36         | 1.929        |
| IPTW                 | 263/5,525 (4.8%)  | 70/1,905 (3.7%)   | 1.237        | 0.98         | 1.562        |
| Acute kidney injury  |                   |                   |              |              |              |
| PS quintile adjusted | 199/2,964 (6.7%)  | 28/762 (3.7%)     | 1.337        | 0.89         | 2.009        |
| PS matched           | 41/738 (5.6%)     | 24/640 (3.8%)     | --           | --           | --           |
| IPTW                 | 199/2,964 (6.7%)  | 28/762 (3.7%)     | 1.183        | 0.885        | 1.582        |
| 30-day readmission   |                   |                   |              |              |              |
| PS quintile adjusted | 554/4,829 (11.5%) | 263/1,642 (16.0%) | <b>0.772</b> | <b>0.662</b> | <b>0.901</b> |
| PS matched           | 154/1,261 (12.2%) | 172/1,210 (14.2%) | 0.891        | 0.606        | 1.309        |
| IPTW                 | 554/4,829 (11.5%) | 263/1,642 (16.0%) | <b>0.842</b> | <b>0.735</b> | <b>0.965</b> |

Table S4. Subgroup analyses of time-to-event outcomes among hospitalized patients with COVID-19 and treated with remdesivir-based regimens and non-remdesivir-based regimens, index dates from January 1, 2021 to November 30, 2021 (*n* = 11,436)

| Time-to-event outcomes | No. of events / No. of patients (%) |                     | Hazard ratio | Lower confidence limit | Upper confidence limit |
|------------------------|-------------------------------------|---------------------|--------------|------------------------|------------------------|
|                        | Remdesivir                          | Non-remdesivir      |              |                        |                        |
| Inpatient mortality    |                                     |                     |              |                        |                        |
| PS quintile adjusted   | 1,136/8,978 (12.7%)                 | 355/2,458 (14.4%)   | <b>0.779</b> | <b>0.686</b>           | <b>0.885</b>           |
| PS matched             | 241/1,865 (12.9%)                   | 279/1,929 (14.5%)   | <b>0.607</b> | <b>0.403</b>           | <b>0.913</b>           |
| IPTW                   | 1,136/8,978 (12.7%)                 | 355/2,458 (14.4%)   | <b>0.784</b> | <b>0.71</b>            | <b>0.866</b>           |
| 30-day mortality       |                                     |                     |              |                        |                        |
| PS quintile adjusted   | 279/7,842 (3.6%)                    | 126/2,103 (6.0%)    | <b>0.771</b> | <b>0.615</b>           | <b>0.966</b>           |
| PS matched             | 65/1,624 (4.0%)                     | 88/1,650 (5.3%)     | 0.659        | 0.412                  | 1.053                  |
| IPTW                   | 279/7,842 (3.6%)                    | 126/2,103 (6.0%)    | <b>0.809</b> | <b>0.668</b>           | <b>0.979</b>           |
| 60-day mortality       |                                     |                     |              |                        |                        |
| PS quintile adjusted   | 348/7,842 (4.4%)                    | 167/2,103 (7.9%)    | <b>0.737</b> | <b>0.604</b>           | <b>0.899</b>           |
| PS matched             | 84/1,624 (5.2%)                     | 116/1,650 (7%)      | 0.661        | 0.436                  | 1.001                  |
| IPTW                   | 348/7,842 (4.4%)                    | 167/2,103 (7.9%)    | <b>0.775</b> | <b>0.655</b>           | <b>0.918</b>           |
| 90-day mortality       |                                     |                     |              |                        |                        |
| PS quintile adjusted   | 402/7,842 (5.1%)                    | 191/2,103 (9.1%)    | <b>0.75</b>  | <b>0.623</b>           | <b>0.902</b>           |
| PS matched             | 103/1,624 (6.3%)                    | 130/1,650 (7.9%)    | 0.735        | 0.51                   | 1.059                  |
| IPTW                   | 402/7,842 (5.1%)                    | 191/2,103 (9.1%)    | <b>0.798</b> | <b>0.681</b>           | <b>0.935</b>           |
| Hospital discharge     |                                     |                     |              |                        |                        |
| PS quintile adjusted   | 7,842/8,978 (87.3%)                 | 2,103/2,458 (85.6%) | <b>0.876</b> | <b>0.832</b>           | <b>0.922</b>           |
| PS matched             | 1,624/1,865 (87.1%)                 | 1,650/1,929 (85.5%) | <b>0.75</b>  | <b>0.665</b>           | <b>0.845</b>           |
| IPTW                   | 7,842/8,978 (87.3%)                 | 2,103/2,458 (85.6%) | <b>0.885</b> | <b>0.851</b>           | <b>0.921</b>           |
| ICU discharge          |                                     |                     |              |                        |                        |
| PS quintile adjusted   | 2,495/3,432 (72.7%)                 | 603/882 (68.4%)     | 0.941        | 0.857                  | 1.034                  |
| PS matched             | 440/639 (68.9%)                     | 487/707 (68.9%)     | 0.687        | 0.472                  | 0.999                  |
| IPTW                   | 2,495/3,432 (72.7%)                 | 603/882 (68.4%)     | 0.955        | 0.889                  | 1.024                  |
| Bacterial infection    |                                     |                     |              |                        |                        |
| PS quintile adjusted   | 1,003/8,813 (11.4%)                 | 228/2,404 (9.5%)    | 1.055        | 0.906                  | 1.229                  |
| PS matched             | 208/1,826 (11.4%)                   | 171/1,884 (9.1%)    | 1.304        | 0.888                  | 1.915                  |

|                      |                        |                   |              |              |              |
|----------------------|------------------------|-------------------|--------------|--------------|--------------|
| IPTW                 | 1,003/8,813<br>(11.4%) | 228/2,404 (9.5%)  | 1.005        | 0.897        | 1.126        |
| Fungal infection     |                        |                   |              |              |              |
| PS quintile adjusted | 365/8,972 (4.1%)       | 100/2,454 (4.1%)  | 0.861        | 0.68         | 1.089        |
| PS matched           | 75/1,863 (4.0%)        | 78/1,927 (4.0%)   | 0.684        | 0.338        | 1.385        |
| IPTW                 | 365/8,972 (4.1%)       | 100/2,454 (4.1%)  | 0.857        | 0.715        | 1.028        |
| Acute kidney injury  |                        |                   |              |              |              |
| PS quintile adjusted | 280/4,922 (5.7%)       | 45/1,022 (4.4%)   | 0.833        | 0.602        | 1.152        |
| PS matched           | 51/911 (5.6%)          | 42/900 (4.7%)     | 1            | 0.202        | 4.955        |
| IPTW                 | 280/4,922 (5.7%)       | 45/1,022 (4.4%)   | <b>0.74</b>  | <b>0.596</b> | <b>0.919</b> |
| 30-day readmission   |                        |                   |              |              |              |
| PS quintile adjusted | 809/7,842 (10.3%)      | 315/2,103 (15.0%) | <b>0.822</b> | <b>0.715</b> | <b>0.944</b> |
| PS matched           | 187/1,624 (11.5%)      | 225/1,650 (13.6%) | 0.826        | 0.625        | 1.092        |
| IPTW                 | 809/7,842 (10.3%)      | 315/2,103 (15.0%) | <b>0.865</b> | <b>0.77</b>  | <b>0.972</b> |



Table S5. Subgroup analyses of time-to-event outcomes among hospitalized patients with COVID-19 and treated with remdesivir-based regimens and non-remdesivir-based regimens, supplemental oxygen at baseline (*n* = 13,922)

|                        | No. of events / No. of patients (%) |                     | Hazard ratio | Lower confidence limit | Upper confidence limit |
|------------------------|-------------------------------------|---------------------|--------------|------------------------|------------------------|
| Time-to-event outcomes | Remdesivir                          | Non-remdesivir      |              |                        |                        |
| Inpatient mortality    |                                     |                     |              |                        |                        |
| PS quintile adjusted   | 1,100/11,029 (10.0%)                | 365/2,893 (12.6%)   | <b>0.733</b> | <b>0.646</b>           | <b>0.832</b>           |
| PS matched             | 242/2,357 (10.3%)                   | 284/2,381 (11.9%)   | <b>0.625</b> | <b>0.439</b>           | <b>0.89</b>            |
| IPTW                   | 1,100/11,029 (10.0%)                | 365/2,893 (12.6%)   | <b>0.744</b> | <b>0.673</b>           | <b>0.823</b>           |
| 30-day mortality       |                                     |                     |              |                        |                        |
| PS quintile adjusted   | 358/9,929 (3.6%)                    | 168/2,528 (6.6%)    | <b>0.7</b>   | <b>0.577</b>           | <b>0.848</b>           |
| PS matched             | 92/2,115 (4.3%)                     | 127/2,097 (6.1%)    | <b>0.58</b>  | <b>0.405</b>           | <b>0.831</b>           |
| IPTW                   | 358/9,929 (3.6%)                    | 168/2,528 (6.6%)    | <b>0.709</b> | <b>0.601</b>           | <b>0.837</b>           |
| 60-day mortality       |                                     |                     |              |                        |                        |
| PS quintile adjusted   | 467/9,929 (4.7%)                    | 217/2,528 (8.6%)    | <b>0.706</b> | <b>0.596</b>           | <b>0.836</b>           |
| PS matched             | 114/2,115 (5.4%)                    | 165/2,097 (7.9%)    | <b>0.54</b>  | <b>0.388</b>           | <b>0.752</b>           |
| IPTW                   | 467/9,929 (4.7%)                    | 217/2,528 (8.6%)    | <b>0.724</b> | <b>0.626</b>           | <b>0.838</b>           |
| 90-day mortality       |                                     |                     |              |                        |                        |
| PS quintile adjusted   | 540/9,929 (5.4%)                    | 246/2,528 (9.7%)    | <b>0.727</b> | <b>0.621</b>           | <b>0.852</b>           |
| PS matched             | 136/2,115 (6.4%)                    | 184/2,097 (8.8%)    | <b>0.538</b> | <b>0.396</b>           | <b>0.731</b>           |
| IPTW                   | 540/9,929 (5.4%)                    | 246/2,528 (9.7%)    | <b>0.755</b> | <b>0.659</b>           | <b>0.865</b>           |
| Hospital discharge     |                                     |                     |              |                        |                        |
| PS quintile adjusted   | 9,929/11,029 (90%)                  | 2,528/2,893 (87.4%) | <b>0.874</b> | <b>0.835</b>           | <b>0.915</b>           |
| PS matched             | 2,115/2,357 (89.7%)                 | 2,097/2,381 (88.1%) | <b>0.751</b> | <b>0.683</b>           | <b>0.826</b>           |
| IPTW                   | 9,929/11,029 (90%)                  | 2,528/2,893 (87.4%) | <b>0.867</b> | <b>0.837</b>           | <b>0.898</b>           |
| ICU discharge          |                                     |                     |              |                        |                        |
| PS quintile adjusted   | 2,894/3,764 (76.9%)                 | 666/933 (71.4%)     | 0.92         | 0.841                  | 1.006                  |
| PS matched             | 519/704 (73.7%)                     | 562/775 (72.5%)     | 0.821        | 0.597                  | 1.129                  |
| IPTW                   | 2,894/3,764 (76.9%)                 | 666/933 (71.4%)     | <b>0.913</b> | <b>0.854</b>           | <b>0.976</b>           |
| Bacterial infection    |                                     |                     |              |                        |                        |
| PS quintile adjusted   | 997/10,858 (9.2%)                   | 214/2,834 (7.6%)    | 1.151        | 0.985                  | 1.346                  |
| PS matched             | 232/2,318 (10.0%)                   | 163/2,338 (7.0%)    | 1.415        | 0.995                  | 2.012                  |
| IPTW                   | 997/10,858 (9.2%)                   | 214/2,834 (7.6%)    | <b>1.126</b> | <b>1.002</b>           | <b>1.266</b>           |
| Fungal infection       |                                     |                     |              |                        |                        |

|                      |                     |                   |              |              |              |
|----------------------|---------------------|-------------------|--------------|--------------|--------------|
| PS quintile adjusted | 374/11,022 (3.4%)   | 92/2,891 (3.2%)   | 0.929        | 0.73         | 1.183        |
| PS matched           | 75/2,356 (3.2%)     | 70/2,380 (2.9%)   | 0.8          | 0.415        | 1.544        |
| IPTW                 | 374/11,022 (3.4%)   | 92/2,891 (3.2%)   | 0.964        | 0.8          | 1.162        |
| Acute kidney injury  |                     |                   |              |              |              |
| PS quintile adjusted | 255/6,077 (4.2%)    | 44/1,211 (3.6%)   | 0.739        | 0.533        | 1.024        |
| PS matched           | 46/1,180 (3.9%)     | 43/1,126 (3.8%)   | 1.333        | 0.298        | 5.957        |
| IPTW                 | 255/6,077 (4.2%)    | 44/1,211 (3.6%)   | <b>0.65</b>  | <b>0.521</b> | <b>0.81</b>  |
| 30-day readmission   |                     |                   |              |              |              |
| PS quintile adjusted | 1,074/9,929 (10.8%) | 414/2,528 (16.4%) | <b>0.765</b> | <b>0.679</b> | <b>0.861</b> |
| PS matched           | 249/2,115 (11.8%)   | 306/2,097 (14.6%) | <b>0.778</b> | <b>0.623</b> | <b>0.973</b> |
| IPTW                 | 1,074/9,929 (10.8%) | 414/2,528 (16.4%) | <b>0.829</b> | <b>0.75</b>  | <b>0.917</b> |

Table S6. Subgroup analyses of time-to-event outcomes among hospitalized patients with COVID-19 and treated with remdesivir-based regimens and non-remdesivir-based regimens, no supplemental oxygen at baseline (*n* = 2500)

| Time-to-event outcomes | No. of events / No. of patients (%) |                 | Hazard ratio | Lower confidence limit | Upper confidence limit |
|------------------------|-------------------------------------|-----------------|--------------|------------------------|------------------------|
|                        | Remdesivir                          | Non-remdesivir  |              |                        |                        |
| Inpatient mortality    |                                     |                 |              |                        |                        |
| PS quintile adjusted   | 152/1,531 (9.9%)                    | 72/969 (7.4%)   | 1.028        | 0.76                   | 1.39                   |
| PS matched             | 55/582 (9.5%)                       | 35/528 (6.6%)   | 0.25         | 0.028                  | 2.237                  |
| IPTW                   | 152/1,531 (9.9%)                    | 72/969 (7.4%)   | 0.978        | 0.745                  | 1.285                  |
| 30-day mortality       |                                     |                 |              |                        |                        |
| PS quintile adjusted   | 55/1,379 (4%)                       | 50/897 (5.6%)   | 0.883        | 0.593                  | 1.313                  |
| PS matched             | 21/527 (4%)                         | 24/493 (4.9%)   | 1.75         | 0.512                  | 5.978                  |
| IPTW                   | 55/1,379 (4%)                       | 50/897 (5.6%)   | 1.086        | 0.749                  | 1.575                  |
| 60-day mortality       |                                     |                 |              |                        |                        |
| PS quintile adjusted   | 76/1,379 (5.5%)                     | 73/897 (8.1%)   | 0.811        | 0.581                  | 1.132                  |
| PS matched             | 32/527 (6.1%)                       | 34/493 (6.9%)   | 1.286        | 0.479                  | 3.452                  |
| IPTW                   | 76/1,379 (5.5%)                     | 73/897 (8.1%)   | 0.955        | 0.696                  | 1.312                  |
| 90-day mortality       |                                     |                 |              |                        |                        |
| PS quintile adjusted   | 82/1,379 (5.9%)                     | 80/897 (8.9%)   | 0.802        | 0.582                  | 1.104                  |
| PS matched             | 37/527 (7%)                         | 36/493 (7.3%)   | 1.375        | 0.553                  | 3.418                  |
| IPTW                   | 82/1,379 (5.9%)                     | 80/897 (8.9%)   | 0.948        | 0.699                  | 1.286                  |
| Hospital discharge     |                                     |                 |              |                        |                        |
| PS quintile adjusted   | 1,379/1,531 (90.1%)                 | 897/969 (92.6%) | <b>0.77</b>  | <b>0.703</b>           | <b>0.842</b>           |
| PS matched             | 527/582 (90.5%)                     | 493/528 (93.4%) | <b>0.55</b>  | <b>0.402</b>           | <b>0.754</b>           |
| IPTW                   | 1,379/1,531 (90.1%)                 | 897/969 (92.6%) | <b>0.743</b> | <b>0.684</b>           | <b>0.807</b>           |
| ICU discharge          |                                     |                 |              |                        |                        |
| PS quintile adjusted   | 487/612 (79.6%)                     | 228/281 (81.1%) | <b>0.793</b> | <b>0.672</b>           | <b>0.935</b>           |
| PS matched             | 181/227 (79.7%)                     | 143/169 (84.6%) | 0.4          | 0.125                  | 1.275                  |
| IPTW                   | 487/612 (79.6%)                     | 228/281 (81.1%) | <b>0.754</b> | <b>0.649</b>           | <b>0.875</b>           |
| Bacterial infection    |                                     |                 |              |                        |                        |
| PS quintile adjusted   | 162/1,506 (10.8%)                   | 65/954 (6.8%)   | <b>1.455</b> | <b>1.075</b>           | <b>1.971</b>           |
| PS matched             | 68/571 (11.9%)                      | 30/519 (5.8%)   | 1.75         | 0.512                  | 5.978                  |
| IPTW                   | 162/1,506 (10.8%)                   | 65/954 (6.8%)   | <b>1.491</b> | <b>1.108</b>           | <b>2.006</b>           |
| Fungal infection       |                                     |                 |              |                        |                        |
| PS quintile adjusted   | 52/1,531 (3.4%)                     | 20/969 (2.1%)   | 1.318        | 0.754                  | 2.302                  |
| PS matched             | 16/582 (2.7%)                       | 6/528 (1.1%)    | 2            | 0.181                  | 22.053                 |
| IPTW                   | 52/1,531 (3.4%)                     | 20/969 (2.1%)   | 1.701        | 0.977                  | 2.964                  |

|                      |                   |                 |              |              |              |
|----------------------|-------------------|-----------------|--------------|--------------|--------------|
| Acute kidney injury  |                   |                 |              |              |              |
| PS quintile adjusted | 47/840 (5.6%)     | 8/416 (1.9%)    | 2.207        | 0.994        | 4.899        |
| PS matched           | 15/311 (4.8%)     | 4/270 (1.5%)    | --           | --           | --           |
| IPTW                 | 47/840 (5.6%)     | 8/416 (1.9%)    | <b>2.196</b> | <b>1.088</b> | <b>4.434</b> |
| 30-day readmission   |                   |                 |              |              |              |
| PS quintile adjusted | 149/1,379 (10.8%) | 131/897 (14.6%) | <b>0.739</b> | <b>0.577</b> | <b>0.946</b> |
| PS matched           | 60/527 (11.4%)    | 67/493 (13.6%)  | 1.364        | 0.626        | 2.969        |
| IPTW                 | 149/1,379 (10.8%) | 131/897 (14.6%) | <b>0.736</b> | <b>0.585</b> | <b>0.927</b> |

Table S7. Subgroup analyses of time-to-event outcomes among hospitalized patients with COVID-19 and treated with remdesivir-based regimens and non-remdesivir-based regimens, non-invasive mechanical ventilation at baseline (*n* = 1678)

|                        | No. of events / No. of patients (%) |                 | Hazard ratio | Lower confidence limit | Upper confidence limit |
|------------------------|-------------------------------------|-----------------|--------------|------------------------|------------------------|
| Time-to-event outcomes | Remdesivir                          | Non-remdesivir  |              |                        |                        |
| Inpatient mortality    |                                     |                 |              |                        |                        |
| PS quintile adjusted   | 285/1,363 (20.9%)                   | 74/315 (23.5%)  | 0.836        | 0.636                  | 1.099                  |
| PS matched             | 56/233 (24%)                        | 59/268 (22%)    | 0.667        | 0.111                  | 3.99                   |
| IPTW                   | 285/1,363 (20.9%)                   | 74/315 (23.5%)  | 0.888        | 0.719                  | 1.097                  |
| 30-day mortality       |                                     |                 |              |                        |                        |
| PS quintile adjusted   | 53/1,078 (4.9%)                     | 14/241 (5.8%)   | 1.071        | 0.576                  | 1.993                  |
| PS matched             | 7/177 (4%)                          | 9/209 (4.3%)    | --           | --                     | --                     |
| IPTW                   | 53/1,078 (4.9%)                     | 14/241 (5.8%)   | 1.356        | 0.807                  | 2.281                  |
| 60-day mortality       |                                     |                 |              |                        |                        |
| PS quintile adjusted   | 68/1,078 (6.3%)                     | 17/241 (7.1%)   | 1.102        | 0.632                  | 1.921                  |
| PS matched             | 10/177 (5.6%)                       | 11/209 (5.3%)   | --           | --                     | --                     |
| IPTW                   | 68/1,078 (6.3%)                     | 17/241 (7.1%)   | 1.421        | 0.893                  | 2.262                  |
| 90-day mortality       |                                     |                 |              |                        |                        |
| PS quintile adjusted   | 72/1,078 (6.7%)                     | 22/241 (9.1%)   | 0.907        | 0.55                   | 1.497                  |
| PS matched             | 10/177 (5.6%)                       | 15/209 (7.2%)   | --           | --                     | --                     |
| IPTW                   | 72/1,078 (6.7%)                     | 22/241 (9.1%)   | 1.223        | 0.793                  | 1.885                  |
| Hospital discharge     |                                     |                 |              |                        |                        |
| PS quintile adjusted   | 1,078/1,363 (79.1%)                 | 241/315 (76.5%) | <b>0.86</b>  | <b>0.742</b>           | <b>0.997</b>           |
| PS matched             | 177/233 (76%)                       | 209/268 (78%)   | 0.875        | 0.317                  | 2.413                  |
| IPTW                   | 1,078/1,363 (79.1%)                 | 241/315 (76.5%) | <b>0.84</b>  | <b>0.754</b>           | <b>0.936</b>           |
| ICU discharge          |                                     |                 |              |                        |                        |
| PS quintile adjusted   | 513/755 (67.9%)                     | 108/172 (62.8%) | 0.977        | 0.784                  | 1.216                  |
| PS matched             | 68/114 (59.6%)                      | 89/141 (63.1%)  | 2            | 0.181                  | 22.053                 |
| IPTW                   | 513/755 (67.9%)                     | 108/172 (62.8%) | 0.952        | 0.813                  | 1.115                  |
| Bacterial infection    |                                     |                 |              |                        |                        |
| PS quintile adjusted   | 200/1,334 (15%)                     | 46/304 (15.1%)  | 0.874        | 0.624                  | 1.224                  |
| PS matched             | 31/221 (14%)                        | 35/258 (13.6%)  | --           | --                     | --                     |
| IPTW                   | 200/1,334 (15%)                     | 46/304 (15.1%)  | 0.839        | 0.654                  | 1.075                  |
| Fungal infection       |                                     |                 |              |                        |                        |
| PS quintile adjusted   | 72/1,363 (5.3%)                     | 15/315 (4.8%)   | 0.987        | 0.548                  | 1.779                  |
| PS matched             | 10/233 (4.3%)                       | 11/268 (4.1%)   | --           | --                     | --                     |
| IPTW                   | 72/1,363 (5.3%)                     | 15/315 (4.8%)   | 1.084        | 0.692                  | 1.697                  |

|                      |                   |                |       |       |        |
|----------------------|-------------------|----------------|-------|-------|--------|
| Acute kidney injury  |                   |                |       |       |        |
| PS quintile adjusted | 69/696 (9.9%)     | 7/104 (6.7%)   | 1.046 | 0.474 | 2.307  |
| PS matched           | 7/100 (7%)        | 7/97 (7.2%)    | --    | --    | --     |
| IPTW                 | 69/696 (9.9%)     | 7/104 (6.7%)   | 1.163 | 0.685 | 1.972  |
| 30-day readmission   |                   |                |       |       |        |
| PS quintile adjusted | 114/1,078 (10.6%) | 27/241 (11.2%) | 1.168 | 0.752 | 1.814  |
| PS matched           | 25/177 (14.1%)    | 22/209 (10.5%) | 1     | 0.063 | 15.988 |
| IPTW                 | 114/1,078 (10.6%) | 27/241 (11.2%) | 1.361 | 0.966 | 1.916  |

Table S8. Subgroup analyses of time-to-event outcomes among hospitalized patients with COVID-19 and treated with remdesivir-based regimens and non-remdesivir-based regimens, invasive mechanical ventilation/ECMO at baseline (*n* = 774)

| Time-to-event outcomes | No. of events / No. of patients (%) |                 | Hazard ratio | Lower confidence limit | Upper confidence limit |
|------------------------|-------------------------------------|-----------------|--------------|------------------------|------------------------|
|                        | Remdesivir                          | Non-remdesivir  |              |                        |                        |
| Inpatient mortality    |                                     |                 |              |                        |                        |
| PS quintile adjusted   | 301/586 (51.4%)                     | 109/188 (58.0%) | 0.825        | 0.656                  | 1.037                  |
| PS matched             | 87/153 (56.9%)                      | 87/148 (58.8%)  | 1.5          | 0.423                  | 5.315                  |
| IPTW                   | 301/586 (51.4%)                     | 109/188 (58.0%) | <b>0.816</b> | <b>0.674</b>           | <b>0.987</b>           |
| 30-day mortality       |                                     |                 |              |                        |                        |
| PS quintile adjusted   | 19/285 (6.7%)                       | 8/79 (10.1%)    | 0.787        | 0.333                  | 1.86                   |
| PS matched             | 5/66 (7.6%)                         | 6/61 (9.8%)     | --           | --                     | --                     |
| IPTW                   | 19/285 (6.7%)                       | 8/79 (10.1%)    | 0.877        | 0.406                  | 1.896                  |
| 60-day mortality       |                                     |                 |              |                        |                        |
| PS quintile adjusted   | 24/285 (8.4%)                       | 9/79 (11.4%)    | 0.92         | 0.415                  | 2.038                  |
| PS matched             | 5/66 (7.6%)                         | 7/61 (11.5%)    | --           | --                     | --                     |
| IPTW                   | 24/285 (8.4%)                       | 9/79 (11.4%)    | 1.074        | 0.538                  | 2.146                  |
| 90-day mortality       |                                     |                 |              |                        |                        |
| PS quintile adjusted   | 27/285 (9.5%)                       | 10/79 (12.7%)   | 1.008        | 0.474                  | 2.14                   |
| PS matched             | 6/66 (9.1%)                         | 7/61 (11.5%)    | --           | --                     | --                     |
| IPTW                   | 27/285 (9.5%)                       | 10/79 (12.7%)   | 1.149        | 0.592                  | 2.232                  |
| Hospital discharge     |                                     |                 |              |                        |                        |
| PS quintile adjusted   | 285/586 (48.6%)                     | 79/188 (42%)    | 1.112        | 0.856                  | 1.446                  |
| PS matched             | 66/153 (43.1%)                      | 61/148 (41.2%)  | 4            | 0.447                  | 35.786                 |
| IPTW                   | 285/586 (48.6%)                     | 79/188 (42%)    | 1.085        | 0.879                  | 1.341                  |
| ICU discharge          |                                     |                 |              |                        |                        |
| PS quintile adjusted   | 293/568 (51.6%)                     | 81/181 (44.8%)  | 1.129        | 0.873                  | 1.459                  |
| PS matched             | 71/150 (47.3%)                      | 65/146 (44.5%)  | 4            | 0.447                  | 35.786                 |
| IPTW                   | 293/568 (51.6%)                     | 81/181 (44.8%)  | 1.132        | 0.919                  | 1.394                  |
| Bacterial infection    |                                     |                 |              |                        |                        |
| PS quintile adjusted   | 259/531 (48.8%)                     | 65/165 (39.4%)  | 1.125        | 0.85                   | 1.489                  |
| PS matched             | 59/139 (42.4%)                      | 53/128 (41.4%)  | 2            | 0.366                  | 10.918                 |
| IPTW                   | 259/531 (48.8%)                     | 65/165 (39.4%)  | 1.099        | 0.881                  | 1.371                  |
| Fungal infection       |                                     |                 |              |                        |                        |
| PS quintile adjusted   | 130/581 (22.4%)                     | 43/184 (23.4%)  | 0.944        | 0.661                  | 1.349                  |
| PS matched             | 35/151 (23.2%)                      | 35/145 (24.1%)  | 0.8          | 0.215                  | 2.979                  |
| IPTW                   | 130/581 (22.4%)                     | 43/184 (23.4%)  | 0.881        | 0.658                  | 1.18                   |
| Acute kidney injury    |                                     |                 |              |                        |                        |
| PS quintile adjusted   | 108/273 (39.6%)                     | 14/53 (26.4%)   | 1.654        | 0.935                  | 2.925                  |

|                      |                 |               |              |              |              |
|----------------------|-----------------|---------------|--------------|--------------|--------------|
| PS matched           | 24/58 (41.4%)   | 12/47 (25.5%) | --           | --           | --           |
| IPTW                 | 108/273 (39.6%) | 14/53 (26.4%) | 1.389        | 0.934        | 2.064        |
| 30-day readmission   |                 |               |              |              |              |
| PS quintile adjusted | 26/285 (9.1%)   | 6/79 (7.6%)   | 1.79         | 0.711        | 4.506        |
| PS matched           | 7/66 (10.6%)    | 2/61 (3.3%)   | --           | --           | --           |
| IPTW                 | 26/285 (9.1%)   | 6/79 (7.6%)   | <b>2.766</b> | <b>1.119</b> | <b>6.842</b> |



Table S9. Subgroup analyses of time-to-event outcomes among hospitalized patients with COVID-19 and treated with remdesivir-based regimens and non-remdesivir-based regimens, unvaccinated (*n* = 15,989)

|                        | No. of events / No. of patients (%) |                     | Hazard ratio | Lower confidence limit | Upper confidence limit |
|------------------------|-------------------------------------|---------------------|--------------|------------------------|------------------------|
| Time-to-event outcomes | Remdesivir                          | Non-remdesivir      |              |                        |                        |
| Inpatient mortality    |                                     |                     |              |                        |                        |
| PS quintile adjusted   | 1,629/12,402 (13.1%)                | 528/3,587 (14.7%)   | <b>0.816</b> | <b>0.735</b>           | <b>0.906</b>           |
| PS matched             | 383/2,824 (13.6%)                   | 405/2,798 (14.5%)   | <b>0.664</b> | <b>0.508</b>           | <b>0.868</b>           |
| IPTW                   | 1,629/12,402 (13.1%)                | 528/3,587 (14.7%)   | <b>0.807</b> | <b>0.743</b>           | <b>0.878</b>           |
| 30-day mortality       |                                     |                     |              |                        |                        |
| PS quintile adjusted   | 421/10,773 (3.9%)                   | 200/3,059 (6.5%)    | <b>0.749</b> | <b>0.626</b>           | <b>0.895</b>           |
| PS matched             | 103/2,441 (4.2%)                    | 146/2,393 (6.1%)    | <b>0.597</b> | <b>0.442</b>           | <b>0.805</b>           |
| IPTW                   | 421/10,773 (3.9%)                   | 200/3,059 (6.5%)    | <b>0.775</b> | <b>0.666</b>           | <b>0.903</b>           |
| 60-day mortality       |                                     |                     |              |                        |                        |
| PS quintile adjusted   | 542/10,773 (5%)                     | 262/3,059 (8.6%)    | <b>0.738</b> | <b>0.631</b>           | <b>0.863</b>           |
| PS matched             | 131/2,441 (5.4%)                    | 190/2,393 (7.9%)    | <b>0.579</b> | <b>0.443</b>           | <b>0.758</b>           |
| IPTW                   | 542/10,773 (5%)                     | 262/3,059 (8.6%)    | <b>0.777</b> | <b>0.679</b>           | <b>0.889</b>           |
| 90-day mortality       |                                     |                     |              |                        |                        |
| PS quintile adjusted   | 610/10,773 (5.7%)                   | 294/3,059 (9.6%)    | <b>0.745</b> | <b>0.643</b>           | <b>0.863</b>           |
| PS matched             | 149/2,441 (6.1%)                    | 211/2,393 (8.8%)    | <b>0.616</b> | <b>0.479</b>           | <b>0.793</b>           |
| IPTW                   | 610/10,773 (5.7%)                   | 294/3,059 (9.6%)    | <b>0.79</b>  | <b>0.695</b>           | <b>0.898</b>           |
| Hospital discharge     |                                     |                     |              |                        |                        |
| PS quintile adjusted   | 10,773/12,402 (86.9%)               | 3,059/3,587 (85.3%) | <b>0.874</b> | <b>0.837</b>           | <b>0.912</b>           |
| PS matched             | 2,441/2,824 (86.4%)                 | 2,393/2,798 (85.5%) | <b>0.742</b> | <b>0.684</b>           | <b>0.806</b>           |
| IPTW                   | 10,773/12,402 (86.9%)               | 3,059/3,587 (85.3%) | <b>0.866</b> | <b>0.838</b>           | <b>0.896</b>           |
| ICU discharge          |                                     |                     |              |                        |                        |
| PS quintile adjusted   | 3,622/4,971 (72.9%)                 | 904/1,320 (68.5%)   | 0.958        | 0.887                  | 1.035                  |
| PS matched             | 719/1,033 (69.6%)                   | 732/1,060 (69.1%)   | <b>0.733</b> | <b>0.571</b>           | <b>0.94</b>            |
| IPTW                   | 3,622/4,971 (72.9%)                 | 904/1,320 (68.5%)   | 0.945        | 0.891                  | 1.002                  |
| Bacterial infection    |                                     |                     |              |                        |                        |
| PS quintile adjusted   | 1,418/12,167 (11.7%)                | 329/3,498 (9.4%)    | <b>1.148</b> | <b>1.011</b>           | <b>1.303</b>           |

|                      |                      |                   |              |              |              |
|----------------------|----------------------|-------------------|--------------|--------------|--------------|
| PS matched           | 341/2,757 (12.4%)    | 247/2,728 (9.1%)  | <b>1.424</b> | <b>1.101</b> | <b>1.842</b> |
| IPTW                 | 1,418/12,167 (11.7%) | 329/3,498 (9.4%)  | 1.082        | 0.982        | 1.193        |
| Fungal infection     |                      |                   |              |              |              |
| PS quintile adjusted | 552/12,393 (4.5%)    | 140/3,583 (3.9%)  | 1.042        | 0.856        | 1.269        |
| PS matched           | 117/2,822 (4.1%)     | 107/2,794 (3.8%)  | 0.708        | 0.456        | 1.099        |
| IPTW                 | 552/12,393 (4.5%)    | 140/3,583 (3.9%)  | 1.045        | 0.895        | 1.219        |
| Acute kidney injury  |                      |                   |              |              |              |
| PS quintile adjusted | 442/6,899 (6.4%)     | 64/1,526 (4.2%)   | 1.077        | 0.822        | 1.411        |
| PS matched           | 87/1,448 (6%)        | 58/1,333 (4.4%)   | 1.143        | 0.414        | 3.152        |
| IPTW                 | 442/6,899 (6.4%)     | 64/1,526 (4.2%)   | 0.958        | 0.797        | 1.151        |
| 30-day readmission   |                      |                   |              |              |              |
| PS quintile adjusted | 1,100/10,773 (10.2%) | 447/3,059 (14.6%) | <b>0.796</b> | <b>0.708</b> | <b>0.894</b> |
| PS matched           | 268/2,441 (11%)      | 319/2,393 (13.3%) | <b>0.807</b> | <b>0.663</b> | <b>0.982</b> |
| IPTW                 | 1,100/10,773 (10.2%) | 447/3,059 (14.6%) | <b>0.854</b> | <b>0.774</b> | <b>0.943</b> |

Table S10. Subgroup analyses of time-to-event outcomes among hospitalized patients with COVID-19 and treated with remdesivir-based regimens and non-remdesivir-based regimens, fully vaccinated ( $n = 2355$ )

|                        | No. of events / No. of patients (%) |                 | Hazard ratio | Lower confidence limit | Upper confidence limit |
|------------------------|-------------------------------------|-----------------|--------------|------------------------|------------------------|
| Time-to-event outcomes | Remdesivir                          | Non-remdesivir  |              |                        |                        |
| Inpatient mortality    |                                     |                 |              |                        |                        |
| PS quintile adjusted   | 205/1,690 (12.1%)                   | 91/665 (13.7%)  | <b>0.607</b> | <b>0.46</b>            | <b>0.801</b>           |
| PS matched             | 56/411 (13.6%)                      | 59/441 (13.4%)  | 0.667        | 0.111                  | 3.99                   |
| IPTW                   | 205/1,690 (12.1%)                   | 91/665 (13.7%)  | <b>0.623</b> | <b>0.497</b>           | <b>0.781</b>           |
| 30-day mortality       |                                     |                 |              |                        |                        |
| PS quintile adjusted   | 61/1,485 (4.1%)                     | 39/574 (6.8%)   | 0.852        | 0.555                  | 1.309                  |
| PS matched             | 21/355 (5.9%)                       | 19/382 (5%)     | 1            | 0.25                   | 3.998                  |
| IPTW                   | 61/1,485 (4.1%)                     | 39/574 (6.8%)   | 0.96         | 0.642                  | 1.436                  |
| 60-day mortality       |                                     |                 |              |                        |                        |
| PS quintile adjusted   | 90/1,485 (6.1%)                     | 50/574 (8.7%)   | 0.966        | 0.667                  | 1.398                  |
| PS matched             | 29/355 (8.2%)                       | 25/382 (6.5%)   | 0.8          | 0.215                  | 2.979                  |
| IPTW                   | 90/1,485 (6.1%)                     | 50/574 (8.7%)   | 1.1          | 0.781                  | 1.548                  |
| 90-day mortality       |                                     |                 |              |                        |                        |
| PS quintile adjusted   | 107/1,485 (7.2%)                    | 59/574 (10.3%)  | 0.973        | 0.693                  | 1.368                  |
| PS matched             | 39/355 (11%)                        | 29/382 (7.6%)   | 1            | 0.323                  | 3.101                  |
| IPTW                   | 107/1,485 (7.2%)                    | 59/574 (10.3%)  | 1.1          | 0.806                  | 1.503                  |
| Hospital discharge     |                                     |                 |              |                        |                        |
| PS quintile adjusted   | 1,485/1,690 (87.9%)                 | 574/665 (86.3%) | <b>0.789</b> | <b>0.71</b>            | <b>0.876</b>           |
| PS matched             | 355/411 (86.4%)                     | 382/441 (86.6%) | 0.61         | 0.371                  | 1.003                  |
| IPTW                   | 1,485/1,690 (87.9%)                 | 574/665 (86.3%) | <b>0.796</b> | <b>0.73</b>            | <b>0.869</b>           |
| ICU discharge          |                                     |                 |              |                        |                        |
| PS quintile adjusted   | 455/614 (74.1%)                     | 146/213 (68.5%) | <b>0.799</b> | <b>0.654</b>           | <b>0.976</b>           |
| PS matched             | 100/141 (70.9%)                     | 100/143 (69.9%) | 1            | 0.063                  | 15.988                 |
| IPTW                   | 455/614 (74.1%)                     | 146/213 (68.5%) | <b>0.815</b> | <b>0.692</b>           | <b>0.959</b>           |
| Bacterial infection    |                                     |                 |              |                        |                        |
| PS quintile adjusted   | 166/1,652 (10%)                     | 54/649 (8.3%)   | 1.106        | 0.794                  | 1.541                  |
| PS matched             | 42/402 (10.4%)                      | 27/432 (6.3%)   | 2.5          | 0.485                  | 12.886                 |
| IPTW                   | 166/1,652 (10%)                     | 54/649 (8.3%)   | 1.238        | 0.931                  | 1.648                  |
| Fungal infection       |                                     |                 |              |                        |                        |
| PS quintile adjusted   | 72/1,687 (4.3%)                     | 27/663 (4.1%)   | 0.752        | 0.462                  | 1.222                  |
| PS matched             | 18/410 (4.4%)                       | 12/441 (2.7%)   | 1            | 0.063                  | 15.988                 |
| IPTW                   | 72/1,687 (4.3%)                     | 27/663 (4.1%)   | 0.783        | 0.522                  | 1.175                  |

|                      |                   |                |              |              |              |
|----------------------|-------------------|----------------|--------------|--------------|--------------|
| Acute kidney injury  |                   |                |              |              |              |
| PS quintile adjusted | 35/779 (4.5%)     | 8/217 (3.7%)   | 0.781        | 0.344        | 1.775        |
| PS matched           | 5/165 (3%)        | 7/172 (4.1%)   | --           | --           | --           |
| IPTW                 | 35/779 (4.5%)     | 8/217 (3.7%)   | <b>0.537</b> | <b>0.314</b> | <b>0.919</b> |
| 30-day readmission   |                   |                |              |              |              |
| PS quintile adjusted | 206/1,485 (13.9%) | 109/574 (19%)  | 0.827        | 0.643        | 1.063        |
| PS matched           | 56/355 (15.8%)    | 63/382 (16.5%) | 1            | 0.323        | 3.101        |
| IPTW                 | 206/1,485 (13.9%) | 109/574 (19%)  | 0.868        | 0.695        | 1.083        |

Table S11. Sensitivity analyses of time-to-event outcomes among hospitalized patients with COVID-19 and treated with remdesivir-based regimens and non-remdesivir-based regimens, controlling for corticosteroid duration

|                        | No. of events / No. of patients (%) |                     | Hazard ratio | Lower confidence limit | Upper confidence limit |
|------------------------|-------------------------------------|---------------------|--------------|------------------------|------------------------|
| Time-to-event outcomes | Remdesivir                          | Non-remdesivir      |              |                        |                        |
| Inpatient mortality    |                                     |                     |              |                        |                        |
| PS quintile adjusted   | 1,838/14,509 (12.7%)                | 620/4,365 (14.2%)   | <b>0.821</b> | <b>0.745</b>           | <b>0.905</b>           |
| PS matched             | 440/3,325 (13.2%)                   | 465/3,325 (14.0%)   | 0.829        | 0.633                  | 1.084                  |
| IPTW                   | 1,838/14,509 (12.7%)                | 620/4,365 (14.2%)   | <b>0.823</b> | <b>0.761</b>           | <b>0.89</b>            |
| 30-day mortality       |                                     |                     |              |                        |                        |
| PS quintile adjusted   | 485/12,671 (3.8%)                   | 240/3,745 (6.4%)    | <b>0.739</b> | <b>0.627</b>           | <b>0.872</b>           |
| PS matched             | 125/2,885 (4.3%)                    | 166/2,860 (5.8%)    | <b>0.671</b> | <b>0.517</b>           | <b>0.872</b>           |
| IPTW                   | 485/12,671 (3.8%)                   | 240/3,745 (6.4%)    | <b>0.776</b> | <b>0.673</b>           | <b>0.895</b>           |
| 60-day mortality       |                                     |                     |              |                        |                        |
| PS quintile adjusted   | 635/12,671 (5.0%)                   | 316/3,745 (8.4%)    | <b>0.737</b> | <b>0.638</b>           | <b>0.851</b>           |
| PS matched             | 161/2,885 (5.6%)                    | 217/2,860 (7.6%)    | <b>0.654</b> | <b>0.518</b>           | <b>0.825</b>           |
| IPTW                   | 635/12,671 (5.0%)                   | 316/3,745 (8.4%)    | <b>0.781</b> | <b>0.689</b>           | <b>0.885</b>           |
| 90-day mortality       |                                     |                     |              |                        |                        |
| PS quintile adjusted   | 721/12,671 (5.7%)                   | 358/3,745 (9.6%)    | <b>0.745</b> | <b>0.651</b>           | <b>0.852</b>           |
| PS matched             | 189/2,885 (6.6%)                    | 242/2,860 (8.5%)    | <b>0.702</b> | <b>0.567</b>           | <b>0.868</b>           |
| IPTW                   | 721/12,671 (5.7%)                   | 358/3,745 (9.6%)    | <b>0.796</b> | <b>0.707</b>           | <b>0.895</b>           |
| Hospital discharge     |                                     |                     |              |                        |                        |
| PS quintile adjusted   | 12,671/14,509 (87.3%)               | 3,745/4,365 (85.8%) | <b>1.124</b> | <b>1.08</b>            | <b>1.169</b>           |
| PS matched             | 2,885/3,325 (86.8%)                 | 2,860/3,325 (86.0%) | 1.102        | 1.000                  | 1.215                  |
| IPTW                   | 12,671/14,509 (87.3%)               | 3,745/4,365 (85.8%) | <b>1.076</b> | <b>1.042</b>           | <b>1.11</b>            |
| ICU discharge          |                                     |                     |              |                        |                        |
| PS quintile adjusted   | 4,187/5,699 (73.5%)                 | 1,083/1,567 (69.1%) | <b>1.118</b> | <b>1.041</b>           | <b>1.201</b>           |
| PS matched             | 839/1,195 (70.2%)                   | 859/1,231 (69.8%)   | 1.058        | 0.819                  | 1.368                  |
| IPTW                   | 4,187/5,699 (73.5%)                 | 1,083/1,567 (69.1%) | <b>1.092</b> | <b>1.034</b>           | <b>1.154</b>           |
| Bacterial infection    |                                     |                     |              |                        |                        |
| PS quintile adjusted   | 1,618/14,229 (11.4%)                | 390/4,257 (9.2%)    | <b>1.142</b> | <b>1.015</b>           | <b>1.285</b>           |
| PS matched             | 390/3,249 (12.0%)                   | 281/3,243 (8.7%)    | <b>1.367</b> | <b>1.093</b>           | <b>1.71</b>            |
| IPTW                   | 1,618/14,229 (11.4%)                | 390/4,257 (9.2%)    | 1.086        | 0.992                  | 1.189                  |
| Fungal infection       |                                     |                     |              |                        |                        |
| PS quintile adjusted   | 628/14,497 (4.3%)                   | 170/4,359 (3.9%)    | 0.966        | 0.806                  | 1.157                  |
| PS matched             | 136/3,322 (4.1%)                    | 122/3,321 (3.7%)    | 0.797        | 0.538                  | 1.181                  |
| IPTW                   | 628/14,497 (4.3%)                   | 170/4,359 (3.9%)    | 0.964        | 0.836                  | 1.112                  |

|                      |                      |                   |              |              |              |
|----------------------|----------------------|-------------------|--------------|--------------|--------------|
| Acute kidney injury  |                      |                   |              |              |              |
| PS quintile adjusted | 479/7,886 (6.1%)     | 73/1,784 (4.1%)   | 1.052        | 0.816        | 1.356        |
| PS matched           | 92/1,649 (5.6%)      | 66/1,540 (4.3%)   | 0.98         | 0.358        | 2.68         |
| IPTW                 | 479/7,886 (6.1%)     | 73/1,784 (4.1%)   | 0.895        | 0.754        | 1.064        |
| 30-day readmission   |                      |                   |              |              |              |
| PS quintile adjusted | 1,363/12,671 (10.8%) | 578/3,745 (15.4%) | <b>0.811</b> | <b>0.731</b> | <b>0.9</b>   |
| PS matched           | 341/2,885 (11.8%)    | 397/2,860 (13.9%) | <b>0.813</b> | <b>0.689</b> | <b>0.959</b> |
| IPTW                 | 1,363/12,671 (10.8%) | 578/3,745 (15.4%) | <b>0.88</b>  | <b>0.805</b> | <b>0.962</b> |
